# Supplementary material for: Prevalence and Characteristics of Obsessive-Compulsive Disorder Among Urban Residents in Wuhan During the Stage of Regular Control of Coronavirus Disease-19 Epidemic
Source: PubMed Central journal article supplement (PMC7772465; doi:10.3389/fpsyt.2020.594167), 2020-12-16
Supplement: Data_Sheet_2.pdf [file Data_Sheet_2.pdf]

Complete steps of multi-variable regression analysis

| Variable      | B      | SE    | Wald    | df | Sig   | Exp(B) | 95% CI<br>(lower-upper<br>) |
|---------------|--------|-------|---------|----|-------|--------|-----------------------------|
| Step1         |        |       |         |    |       |        |                             |
| Sleep latency | 0.553  | 0.105 | 27.761  | 1  | 0.000 | 1.738  | 1.415-2.135                 |
| Constant      | -2.612 | 0.253 | 106.951 | 1  | 0.000 | 0.073  |                             |
| Step2         |        |       |         |    |       |        |                             |
| Comorbidity   | 1.418  | 0.352 | 16.263  | 1  | 0.000 | 4.129  | 2.073-8.226                 |
| Sleep latency | 0.492  | 0.108 | 20.667  | 1  | 0.000 | 1.636  | 1.323-2.022                 |
| Constant      | -2.643 | 0.257 | 105.741 | 1  | 0.000 | 0.071  |                             |
| Step          |        |       |         |    |       |        |                             |
| 3             |        |       |         |    |       |        |                             |
| HCWs          |        |       | 16.454  | 2  | 0.000 |        |                             |
| Students      | 1.095  | 0.332 | 10.918  | 1  | 0.001 | 2.991  | 1.562-5.728                 |
| Others        | 0.024  | 0.305 | 0.006   | 1  | 0.937 | 1.024  | 0.563-1.863                 |
| Comorbidity   | 1.574  | 0.367 | 18.410  | 1  | 0.000 | 4.825  | 2.351-9.901                 |
| Sleep latency | 0.519  | 0.111 | 21.687  | 1  | 0.000 | 1.680  | 1.350-2.090                 |
| Constant      | -3.006 | 0.355 | 71.541  | 1  | 0.000 | 0.049  |                             |
| Step          |        |       |         |    |       |        |                             |
| 4             |        |       |         |    |       |        |                             |
| Single        | 0.552  | 0.276 | 4.009   | 1  | 0.045 | 1.737  | 1.012-2.982                 |
| HCWs          |        |       | 6.994   | 2  | 0.30  |        |                             |

|      |                |        |       |        |   |       |       |             |
|------|----------------|--------|-------|--------|---|-------|-------|-------------|
|      | Students       | 0.827  | 0.356 | 5.402  | 1 | 0.02  | 2.287 | 1.138-4.594 |
|      | Others         | 0.060  | 0.308 | 0.038  | 1 | 0.845 | 1.062 | 0.581-1.942 |
|      | Comorbidity    | 1.558  | 0.367 | 18.040 | 1 | 0.000 | 4.750 | 2.314-9.749 |
|      | Sleep latency  | 0.535  | 0.113 | 22.550 | 1 | 0.000 | 1.708 | 1.370-2.131 |
|      | Constant       | -3.266 | 0.389 | 70.633 | 1 | 0.000 | 0.038 |             |
| Step | Single         | 0.608  | 0.279 | 4.728  | 1 | 0.030 | 1.836 | 1.062-3.175 |
| 5    |                |        |       |        |   |       |       |             |
|      | HCWs           |        |       | 6.350  | 2 | 0.042 |       |             |
|      | Students       | 0.774  | 0.357 | 4.693  | 1 | 0.030 | 2.169 | 1.077-4.370 |
|      | Others         | 0.031  | 0.311 | 0.010  | 1 | 0.921 | 1.031 | 0.561-1.897 |
|      | Comorbidity    | 1.438  | 0.377 | 14.520 | 1 | 0.000 | 4.213 | 2.011-8.828 |
|      | Family history | 0.915  | 0.462 | 3.924  | 1 | 0.048 | 2.497 | 1.010-6.176 |
|      | Sleep latency  | 0.499  | 0.115 | 18.803 | 1 | 0.000 | 1.646 | 1.314-2.063 |
|      | Constant       | -3.242 | 0.391 | 68.646 | 1 | 0.000 | 0.39  |             |
