# Supplementary material for: Prevalence and Characteristics of Obsessive-Compulsive Disorder Among Urban Residents in Wuhan During the Stage of Regular Control of Coronavirus Disease-19 Epidemic
Source: PubMed Central journal article supplement (PMC7772465; doi:10.3389/fpsyt.2020.594167), 2020-12-16
Supplement: Table_1.pdf [file Table_1.pdf]

Table 1 Univariate analysis of factors related to OCD

| Item                          |           | Non-OCD<br>N, (%) | OCD<br>N, (%) | P     | $\chi^2$ or T<br>(Z) |
|-------------------------------|-----------|-------------------|---------------|-------|----------------------|
| Total                         |           | 444(82.07<br>)    | 97(17.93)     |       |                      |
| Gender                        | Male      | 190(82.61<br>)    | 40(17.39)     | 0.726 | 0.123                |
|                               | Female    | 254(81.67<br>)    | 57(18.33)     |       |                      |
| Age<br>group(ye<br>ars), N    | 15-24     | 99(77.34)         | 29(22.66)     | 0.022 | 9.594                |
|                               | 25-34     | 192(79.34<br>)    | 50(20.66)     |       |                      |
|                               | 35-44     | 88(88.89)         | 11(11.11)     |       |                      |
|                               | $\geq 45$ | 65(90.28)         | 7(9.72)       |       |                      |
| Monthly<br>pay<br>(RMB),<br>N | <3000     | 140(79.10<br>)    | 37(20.90)     | 0.442 | 1.635                |
|                               | 3000-5000 | 147(84.00)        | 28(16.00)     |       |                      |

|                         |                   |                |           |       |        |
|-------------------------|-------------------|----------------|-----------|-------|--------|
|                         |                   | )              |           |       |        |
|                         | >5000             | 157(83.07<br>) | 32(16.93) |       |        |
| Marital<br>status, N    | Unmarried         | 180(75.95<br>) | 57(24.05) | 0.001 | 10.738 |
|                         | Married           | 264(86.84<br>) | 40(13.16) |       |        |
| Educatio<br>n level, N  | High school       | 97(85.09)      | 17(14.91) | 0.194 | 4.719  |
|                         | Junior<br>college | 104(90.64<br>) | 19(9.36)  |       |        |
|                         | Bachelor          | 161(82.56<br>) | 34(17.44) |       |        |
|                         | Master<br>degree  | 82(75.23)      | 27(24.77) |       |        |
| Family<br>members,<br>N | 1                 | 28(84.85)      | 5(15.15)  | 0.320 | 3.508  |
|                         | 2-3               | 238(79.60<br>) | 61(20.40) |       |        |
|                         | 4-6               | 164(85.86<br>) | 27(14.14) |       |        |

|                      |               |            |           |       |        |
|----------------------|---------------|------------|-----------|-------|--------|
|                      | >6            | 14(77.78)  | 4(22.22)  |       |        |
| Employment status, N | Employed      | 293(84.68) | 53(15.32) | 0.020 | 9.797  |
|                      | Retired       | 22(88.00)  | 3(12.00)  |       |        |
|                      | In school     | 87(72.50)  | 33(27.50) |       |        |
|                      | In occupation | 42(84.00)  | 8(16.00)  |       |        |
| Occupation, N        | HCWs          | 123(85.42) | 21(14.58) | 0.002 | 12.357 |
|                      | Students      | 80(70.80)  | 33(29.20) |       |        |
|                      | Others        | 241(84.86) | 43(15.14) |       |        |
| District, N          | Wuchang       | 187(82.02) | 41(17.98) | 0.487 | 5.451  |
|                      | Qiaokou       | 24(80.00)  | 6(20.00)  |       |        |
|                      | Jiangan       | 24(80.00)  | 6(20.00)  |       |        |
|                      | Jiangnan      | 48(87.27)  | 7(12.73)  |       |        |
|                      | Hongshan      | 103(78.03) | 29(21.97) |       |        |
|                      | Hanyang       | 37(84.09)  | 7(15.91)  |       |        |
|                      | Qinshan       | 21(95.45)  | 1(4.55)   |       |        |

|                                  |        |            |           |       |       |
|----------------------------------|--------|------------|-----------|-------|-------|
| Duration of residence (month), N | 0-6    | 85(84.16)  | 16(15.84) | 0.182 | 4.869 |
|                                  | 6-12   | 54(72.97)  | 20(27.03) |       |       |
|                                  | 12-36  | 73(82.95)  | 15(17.05) |       |       |
|                                  | >36    | 232(83.45) | 46(16.55) |       |       |
| Exposure level, N                | Low    | 368(82.88) | 76(17.12) | 0.311 | 2.336 |
|                                  | Medium | 59(80.82)  | 14(19.18) |       |       |
|                                  | High   | 17(70.83)  | 7(29.17)  |       |       |
| Confirmed case, N                | Yes    | 9(75.00)   | 3(25.00)  | 0.791 | 0.070 |
|                                  | No     | 435(82.23) | 94(17.77) |       |       |
| Suspected case, N                | Yes    | 11(73.33)  | 4(26.67)  | 0.580 | 0.306 |

|                                         |     |                      |                      |       |        |
|-----------------------------------------|-----|----------------------|----------------------|-------|--------|
|                                         | No  | 433(82.32)           | 93(17.68<br>)        |       |        |
| Asymptomatic case, N                    | Yes | 13(65.00)            | 7(35.00)             | 0.043 | 4.113  |
|                                         | No  | 431(82.73)           | 90(17.27<br>)        |       |        |
| Other mental disease, N                 | Yes | 21(51.22)            | 20(48.78<br>)        | 0.000 | 28.693 |
|                                         | No  | 423(84.60)           | 77(15.40<br>)        |       |        |
| Family history, N                       | Yes | 15(53.57)            | 13(46.43<br>)        | 0.000 | 16.298 |
|                                         | No  | 429(83.63)           | 84(16.37)            |       |        |
| Subjective support score, mean $\pm$ SD |     | 22.42 $\pm$ 5.3<br>4 | 21.18 $\pm$ 4.<br>70 | 0.006 | -2.755 |

|                                              |  |                      |                      |       |        |
|----------------------------------------------|--|----------------------|----------------------|-------|--------|
| Objective support score, mean $\pm$ SD       |  | 8.16 $\pm$ 3.42      | 7.28 $\pm$ 3.0<br>3  | 0.023 | -2.281 |
| Availability of support score, mean $\pm$ SD |  | 7.07 $\pm$ 2.06      | 6.87 $\pm$ 2.0<br>8  | 0.192 | -1.306 |
| SSRS score, mean $\pm$ SD                    |  | 37.66 $\pm$ 8.7<br>3 | 35.32 $\pm$ 7.<br>39 | 0.002 | -3.056 |
| Sleep quality score, mean $\pm$ SD           |  | 1.92 $\pm$ 0.72      | 2.22 $\pm$ 0.8<br>2  | 0.001 | -3.313 |
| Sleep disturban                              |  | 2.14 $\pm$ 1.07      | 2.56 $\pm$ 1.0<br>7  | 0.001 | -3.474 |

|                                             |  |           |               |       |        |
|---------------------------------------------|--|-----------|---------------|-------|--------|
| ce score,<br>mean ±<br>SD                   |  |           |               |       |        |
| Sleep<br>latency<br>score,<br>mean ±<br>SD  |  | 1.69±0.93 | 2.30±1.1<br>5 | 0.000 | -5.179 |
| Sleep<br>duration<br>score,<br>mean ±<br>SD |  | 1.75±0.81 | 1.91±0.8<br>8 | 0.103 | -1.631 |
| PSQI<br>score,<br>mean ±<br>SD              |  | 7.49±2.66 | 8.98±3.0<br>6 | 0.000 | -4.374 |

RMB is China's currency, also know as yuan. HCWs refers to Health Care Workers. SSRS means Social Support Rating Scale. PSQI means Pittsburgh Sleep Quality Index.
